# Supplementary material for: Uptake of bilateral-risk-reducing-mastectomy: Prospective analysis of 7195 women at high-risk of breast cancer
Source: PubMed Central journal article supplement — Breast. 2021 Aug 26;60:45–52. doi: 10.1016/j.breast.2021.08.015 (PMC8406355; doi:10.1016/j.breast.2021.08.015), 2021-08-26

**Supplementary table 1** FHC ovarian cancers

|                            | number | <i>BRCA1/2</i> | %BRCA | BRCA died | % BRCA died | non BRCA died | % non BRCA died | censored BC | RRM BRCA | % RRM BRCA |
|----------------------------|--------|----------------|-------|-----------|-------------|---------------|-----------------|-------------|----------|------------|
| eligible BRRM at entry     |        |                |       |           |             |               |                 |             |          |            |
| OC at entry                | 57     | 34             | 59.6% | 17        | 50.0%       | 5             | 21.7%           | 4           | 2        | 5.9%       |
| no OC at entry             | 32     | 23             | 71.9% | 14        | 60.9%       | 3             | 33.3%           | 7           | 5        | 21.7%      |
| not eligible BRRM at entry |        |                |       |           |             |               |                 |             |          |            |
| OC at entry                | 23     | 1              | 4.3%  | 1         | 100%        | 6             | 27.3%           |             |          |            |
| no OC at entry             | 12     | 3              | 25.0% | 0         | 0.0%        | 3             | 33.3%           |             |          |            |

A total of 124 women who were referred to the FHC had at some time a diagnosis of ovarian cancer. Eighty (64.5%) had a diagnosis before entry and 41/80 (51%) were  $\geq 2$  years from diagnosis. Five never attended the clinic and were not included in any analysis. Forty-four women were diagnosed 0.07-27 years post entry. Eighty-nine women were eligible for BRRM at entry with 32 (36%) being diagnosed after referral. Seventeen of 32 (53%) with ovarian cancer after entry have died 0.5-9 years post diagnosis including 14/22 (64%) *BRCA1/2* mutation carriers. Of the nine survivors who did not have a known *BRCA1/2* pathogenic variant 67% did not have a non-mucinous invasive epithelial cancer (3 had borderline, 2 mucinous and one a germ cell tumour). Five *BRCA1/2* mutation carriers have undergone BRRM with three before ovarian cancer diagnosis. Of those with an ovarian cancer diagnosis who were eligible based on risk for BRRM at entry Of those eligible with ovarian cancer at entry 17/34 (50%) have died 0.7-13.3 years post entry. Two *BRCA1/2* mutation carriers have undergone BRRM in the ovarian cancer at entry group. Of those not eligible for BRRM at entry who developed ovarian cancer 3/5 (60%) of those tested were *BRCA1/2* positive with three of the remaining seven having germ cell tumours. Of those not eligible only one BRCA carrier was later identified after death in a woman who did not attend clinic.

**Supplementary Table 2:** Follow up in women from families with *BRCA1/2* PVs identified after clinic entry

| Mutation after entry                                                          | number | BRCA Positive                 | Negative                    | untested      |
|-------------------------------------------------------------------------------|--------|-------------------------------|-----------------------------|---------------|
| Mutation after entry                                                          | 497    | 242                           | 174                         | 81            |
| RRM before PV found                                                           | 28*    | 15*                           | 12*                         | 1*            |
| RRM after PV                                                                  | 55     | 55                            | 0                           | 0             |
| %RRM                                                                          | 16.7%  | 28.9%                         | 6.9%                        | 1.2%          |
| %RRM no BC                                                                    | 20.3%  | 42.3%                         | 7.8%                        | 1.3%          |
| BC before family PV                                                           | 55*    | 52*                           | 3*                          | 0             |
| Index tested positive                                                         | 24*    | 16* Ovarian<br>8* unaffected  | -                           | -             |
| Died before family PV                                                         | 2*     | 2*                            | 0                           | -             |
| Eligible for pre-symptomatic testing in those without BC or BRRM at family PV | 388    | 149<br>(38.4%)<br>8* after BC | 159<br>(41%)<br>1* after BC | 80<br>(20.6%) |
| BC after family PV before individual testing                                  | 11     | 8*                            | 1*                          | 2             |
| BC after individual testing                                                   | 22     | 18                            | 4                           |               |
| % BC                                                                          | 17.7%  | 32.26%                        | 4.6%                        | 2.5%          |
| %BC in those without BRRM after PV                                            | 8.2%   | 15.6%                         | 3.1%                        | 2.5%          |
| *Censored for pre-symptomatic uptake                                          |        |                               |                             |               |

RRM – risk reducing mastectomy, BC – breast cancer, PV – pathogenic variant

**Supplementary Table 3: Univariate associations with BRRM**

|                             | RRM | Total | %      | Cause specific RRM<br>HR (95% CI) | Cause specific – other<br>HR (95% CI) | SHR RRM<br>HR (95% CI) | SHR other<br>HR (95% CI) |
|-----------------------------|-----|-------|--------|-----------------------------------|---------------------------------------|------------------------|--------------------------|
| Mother died BC <60          | 120 | 1120  | 10.71% | 1.85 (1.50-2.29)                  | 1.30 (1.04-1.65)                      | 1.84 (1.49-2.27)       | 1.28 (1.01-1.61)         |
| no maternal/sister death BC | 302 | 5778  | 5.23%  | Ref                               | Ref                                   | Ref                    | Ref                      |
| Sister Died BC <50          | 37  | 336   | 11.01% | 1.82 (1.30-2.57)                  | 1.33 (0.93-1.91)                      | 1.82 (1.29-2.57)       | 1.31 (0.91-1.88)         |
| mother+sister death         | 8   | 39    | 20.51% |                                   |                                       |                        |                          |
| nulliparous                 | 91  | 1833  | 4.96%  | Ref                               | Ref                                   | Ref                    | Ref                      |
| Parous                      | 357 | 4963  | 7.19%  | 1.38 (1.09-1.73)                  | 1.30 (1.03-1.65)                      | 1.38 (1.09-1.73)       | 1.28 (1.01-1.62)         |
| no biopsy                   | 396 | 6616  | 5.99%  | Ref                               | Ref                                   | Ref                    | Ref                      |
| Biopsy                      | 55  | 579   | 9.50%  | 1.39 (1.04-1.84)                  | 1.47 (0.07-0.31)                      | 1.42 (1.07-1.88)       | 0.15 (0.07-0.31)         |
| Age at entry <30            | 78  | 852   | 9.15%  | Ref                               | Ref                                   | Ref                    | Ref                      |
| Age at entry 30-39          | 244 | 3100  | 7.87%  | 0.88 (0.68-1.14)                  | 1.85 (1.21-2.82)                      | 0.87 (0.68-1.12)       | 1.84 (1.21-2.79 )        |
| Age at entry 40-49          | 99  | 2285  | 4.33%  | 0.48 (0.36-0.64)                  | 2.41 (1.58-3.68)                      | 0.47 (0.35-0.63)       | 2.48 (1.63-3.77)         |
| age at entry 50+            | 30  | 958   | 3.13%  | 0.38 (0.25-0.57)                  | 3.53 (2.26-5.53)                      | 0.36 (0.24-0.55)       | 3.63 (2.33-5.66)         |
| Subtotal                    | 451 | 7195  |        |                                   |                                       |                        |                          |
| era 1 <1994*                | 30  | 556   | 5.40%  | Ref                               | Ref                                   | Ref                    | Ref                      |
| era 2 1994-2003             | 164 | 2426  | 6.76%  | 1.30 (0.88-1.92)                  | 0.63 (0.48-0.81)                      | 1.30 (0.88-1.92)       | 0.62 (0.48-0.79)         |
| era 4 2004-Apr 2013         | 190 | 2426  | 7.8%   | 1.78 (1.21-2.63)                  | 0.50 (0.38-0.68)                      | 1.77 (1.20-2.61)       | 0.47 (0.36-0.63)         |
| May 2013-                   | 67  | 1787  | 3.75%  | 1.61 (1.03-2.50)                  | 0.20 (0.11-0.38)                      | 1.61 (1.04-2.48)       | 0.18 (0.10-0.33)         |
| Subtotal                    | 451 | 7195  |        |                                   |                                       |                        |                          |

BC- breast cancer, HR- hazard ratio, CI – confidence interval, SHR – subhazard ratio

**Supplementary table 4a:** Uptake in *BRCA1/2* carriers with pathogenic variant (PV) known at entry or after entry

|                     | RRM                 |                     | Competing risks (breast cancer/<br>death) |                    |
|---------------------|---------------------|---------------------|-------------------------------------------|--------------------|
|                     | 10 year             | 20 year             | 10 year                                   | 20 year            |
| PV after entry      | 39.43 (31.44-48.62) | 39.43 (31.44-48.62) | 10.57 (6.23-17.62)                        | 15.51 (8.58-27.14) |
| Known at entry      | 47.52 (41.66-53.76) | 51.55 (44.89-58.57) | 8.50 (5.58-12.82)                         | 13.23 (8.99-19.26) |
|                     |                     |                     |                                           |                    |
| <b><i>BRCA1</i></b> |                     |                     |                                           |                    |
| PV after entry      | 35.76 (24.81-49.67) | 35.76 (24.81-49.67) | 9.05 (3.78-20.83)                         | 9.05 (3.78-20.83)  |
| Known at entry      | 50.63 (42.79-59.02) | 56.29 (47.07-65.93) | 8.47 (4.87-14.53)                         | 15.77 (9.66-25.17) |
|                     |                     |                     |                                           |                    |
| <b><i>BRCA2</i></b> |                     |                     |                                           |                    |
| PV after entry      | 42.64 (31.82-55.36) | 42.64 (31.82-55.36) | 11.86 (6.09-22.42)                        | 20.80 (9.87-40.74) |
| Known at entry      | 43.77 (35.31-53.27) | 45.38 (36.64-55.14) | 8.64 (4.54-16.13)                         | 10.05 (5.45-18.14) |

RRM – risk reducing mastectomy

**Supplementary table 4b:** Uptake in *BRCA1/2* carriers with PV known at entry or after entry

|                     | Cause specific – RRM<br>HR (95% CI) | Cause specific -<br>other<br>HR (95% CI) | RRM<br>SHR (95% CI) | Other<br>SHR (95% CI) |
|---------------------|-------------------------------------|------------------------------------------|---------------------|-----------------------|
| PV after entry      | Ref                                 |                                          | Ref                 |                       |
| Known at entry      | 1.19 (0.88-1.64)                    | 0.60 (0.35-1.05)                         | 1.30 (0.94-1.80)    | 0.56 (0.32-0.97)      |
|                     |                                     |                                          |                     |                       |
| <b><i>BRCA1</i></b> |                                     |                                          |                     |                       |
| PV after entry      | Ref                                 |                                          | Ref                 |                       |
| Known at entry      | 1.55 (0.99-2.43)                    | 0.83 (0.37-1.85)                         | 1.62 (1.02-2.57)    | 0.83 (0.37-1.85)      |
|                     |                                     |                                          |                     |                       |
| <b><i>BRCA2</i></b> |                                     |                                          |                     |                       |
| PV after entry      | Ref                                 |                                          | Ref                 |                       |
| Known at entry      | 0.90 (0.58–1.41)                    | 0.37 (0.16-0.82)                         | 1.02 (0.64 – 1.61)  | 0.38 (0.17-0.84)      |

RRM – risk reducing mastectomy, HR – hazard ratio, SHR – subhazard ratio

Supplementary Figure 1: BRRM surgeries per year in FHRPC from 1990-2019

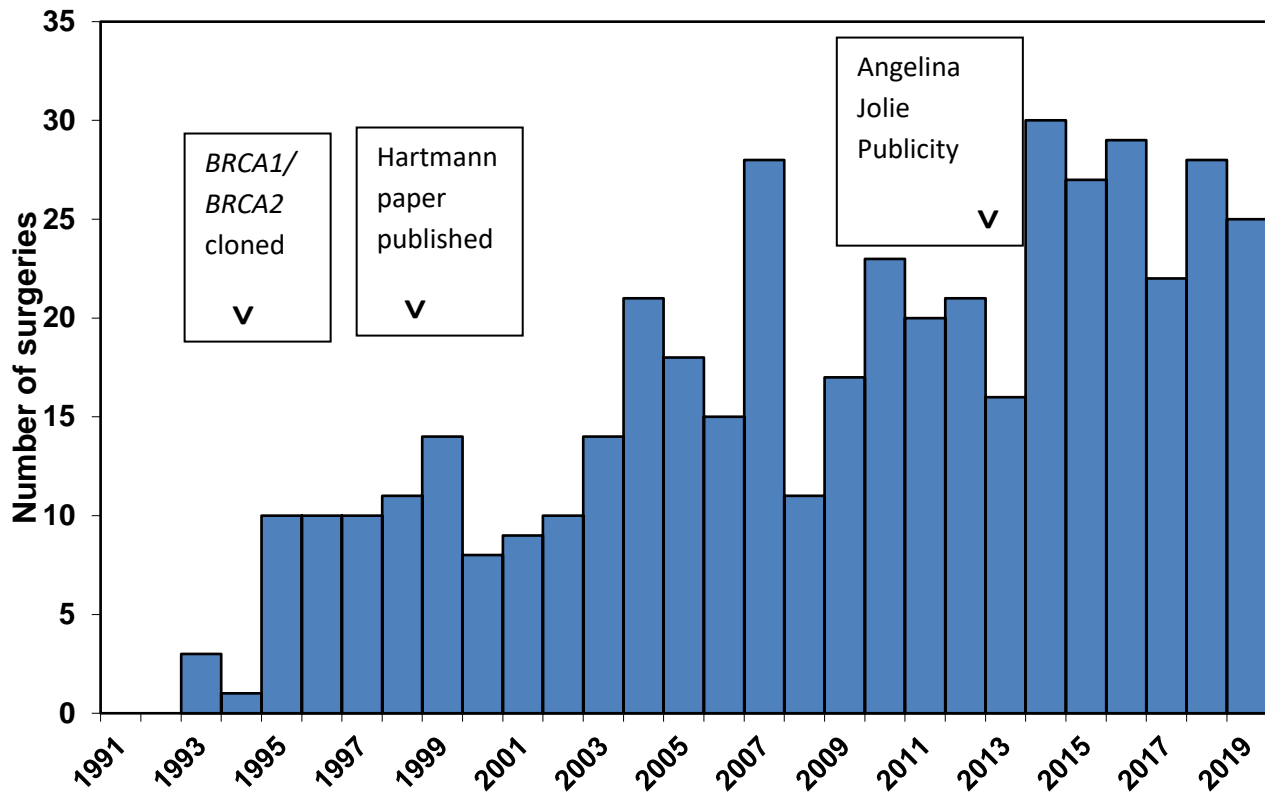

Supplementary Figure 2: Cumulative incidence function (CIF) for a) RRM and b) other causes in BRCA1 families with known PV at entry and families with PVs found after entry

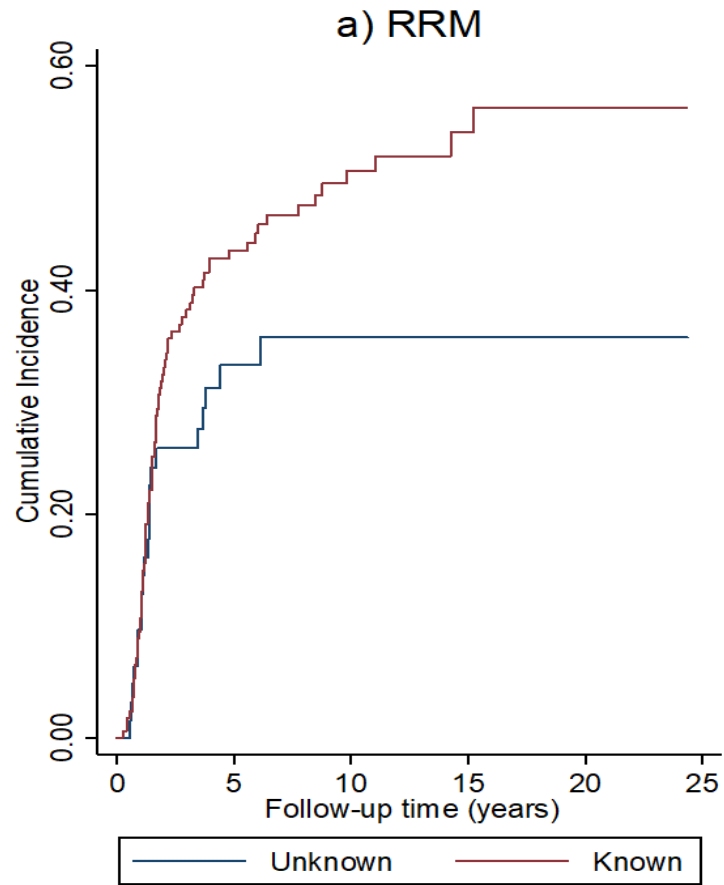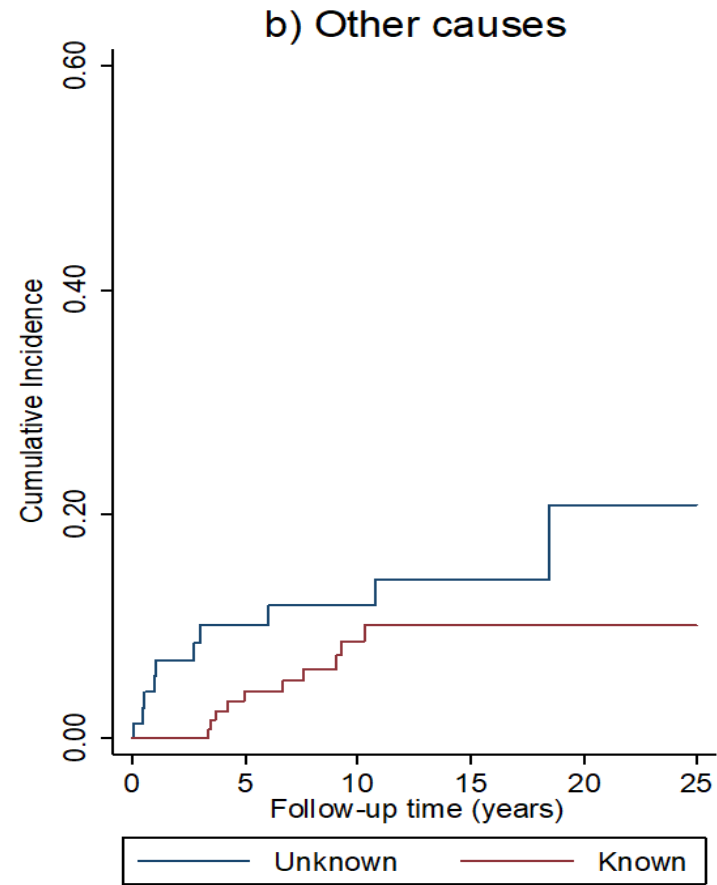

Supplement: mmc1.pdf [file mmc1.pdf]
